# Supplementary material for: Graphitized activated carbon based on big bluestem as an electrode for supercapacitors
Source: Royal Society of Chemistry journal article supplement (doi:10.1039/c3ra46037a), 2014-01-01
Supplement: c3ra46037a.pdf [file c3ra46037a.pdf]

Supplementary data

**Table S-1**

Activation parameters the surface area of activated carbon samples

| Sample #  | catalyst                 | Catalyst concentration mol g <sup>-1</sup> | Temperature °C | Specific surface area m <sup>2</sup> g <sup>-1</sup> |
|-----------|--------------------------|--------------------------------------------|----------------|------------------------------------------------------|
| <b>S1</b> | <b>NaHCO<sub>3</sub></b> | <b>0.05</b>                                | <b>820</b>     | <b>552</b>                                           |
| S1-1      | NaHCO <sub>3</sub>       | 0.025                                      | 820            | 524                                                  |
| <b>S2</b> | <b>NaOH</b>              | <b>0.05</b>                                | <b>820</b>     | <b>1616</b>                                          |
| S2-1      | NaOH                     | 0.025                                      | 820            | 376                                                  |
| <b>S3</b> | <b>KOH</b>               | <b>0.05</b>                                | <b>820</b>     | <b>2490</b>                                          |
| S3-1      | KOH                      | 0.025                                      | 820            | 1058                                                 |

The Table S-1 indicates that KOH is the best catalyst among these three catalysts for creating a higher specific surface area. With the increasing quantity of the catalyst, the surface area of the activated carbon will increase. NaOH is more obvious than the other two catalysts, and NaHCO<sub>3</sub> just show a slightly increase.

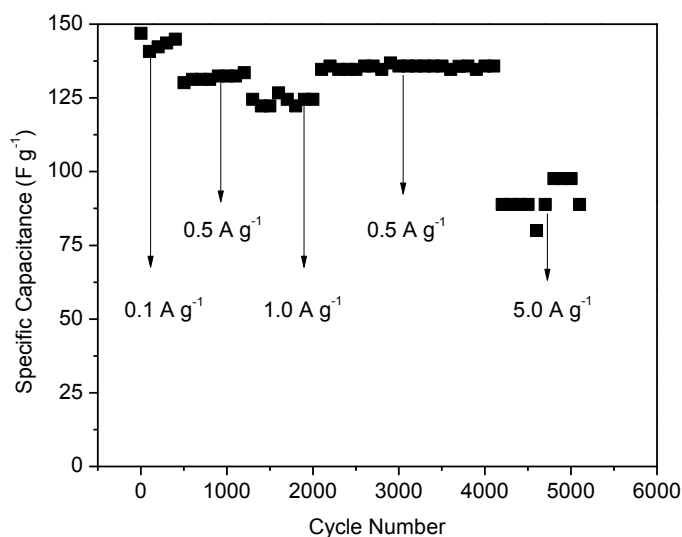

Fig. S1. The cycling performance of S1 at the charge/discharge current of 0.1, 0.5, 1.0 and 5.0 A g<sup>-1</sup>.

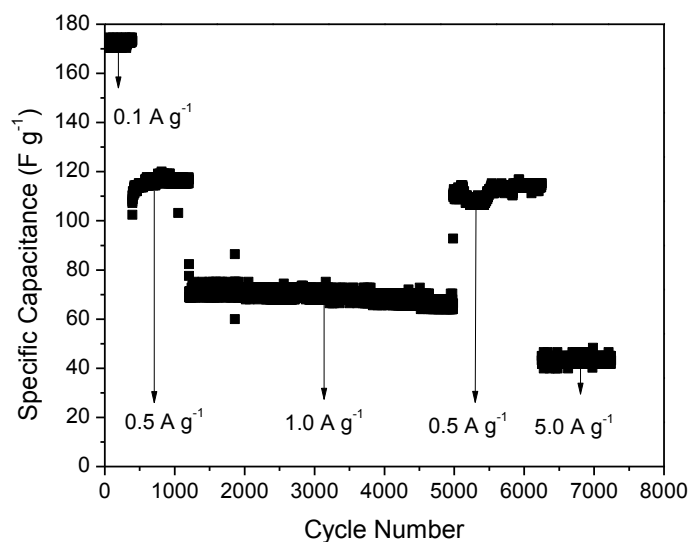

Fig. S2. The cycling performance of S2 at the charge/discharge current of 0.1, 0.5, 1.0 and 5.0 A g<sup>-1</sup>.

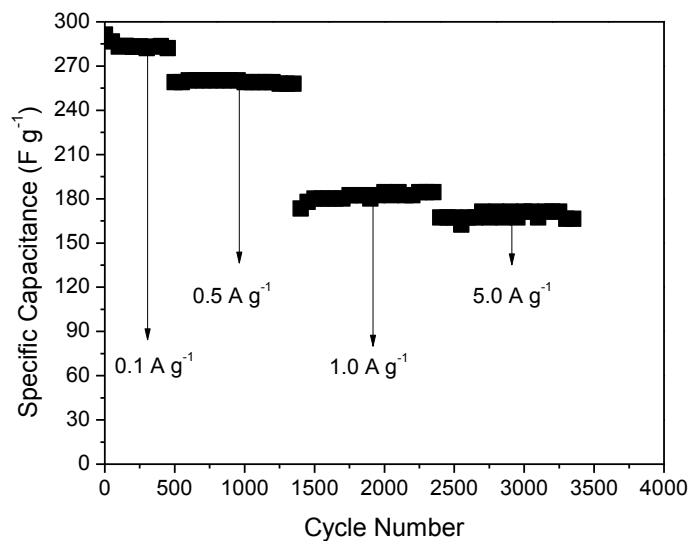

Fig. S3. The cycling performance of S3 at the charge/discharge current of 0.1, 0.5, 1.0 and 5.0 A g<sup>-1</sup>.

The cycling performances of these 3 samples are shown in Fig. S1, Fig. S2 and Fig. S3. As are shown here, at the lower current density, each of these three samples is presenting a

relatively higher specific capacitance than the specific capacitance at high current. Because of the layered graphene and hierarchical porous carbon structures, at the high current density of  $5.0 \text{ A g}^{-1}$ , the activated carbon S3 still present a high specific capacitance of  $172 \text{ F g}^{-1}$ .
